# Supplementary material for: Barriers to meeting the Global Nutrition Target 2025 for Exclusive Breastfeeding: an analysis of three decades (1990, 2000, 2010) in six Latin American and Caribbean countries
Source: Research Square preprint supplement (doi:10.21203/rs.3.rs-779094/v1), 2021-08-09
Supplement: Supplementary file 1 [file dc693a06a5d1e644e115c674.docx]

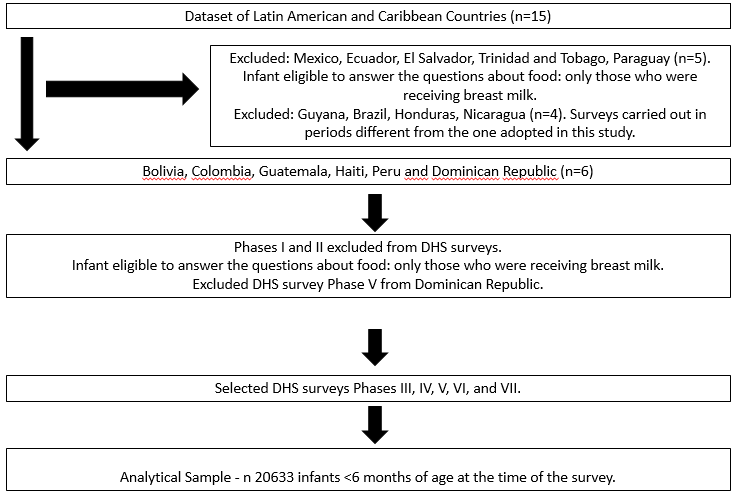


**Figure S1.** Flowchart ofDemographic and Health Survey (DHS) selection from Latin American and Caribbean countries. DHS, 1990s, 2000s and 2010s.
